# Supplementary material
Source: PubMed Central journal article supplement (PMC6034704)
Supplement: NIHMS969869-supplement-SUPPLEMENTAL_MATERIAL.pdf [file NIHMS969869-supplement-SUPPLEMENTAL_MATERIAL.pdf]

**SUPPLEMENTAL MATERIAL**  
Survey design (English Translation)

**FAST** for rapid stroke identification

**辨識中風的徵兆**  
**Is it a stroke?**

**F** **Face** **臉部**  
Face look uneven? 看起來不對稱

**A** **Arm** **手臂**  
One arm hanging down? 一側無法舉起

**S** **Speech** **言語**  
Slurred speech? 突然說話不清

**T** **Time** **立刻**  
Call 112 NOW. 撥打 112 馬上就醫

**中風112**快速識別中風  
**Stroke 112** for rapid stroke identification

**1**張臉  
不對稱  
嘴巴歪



**1 uneven Face**

**1**側手臂  
沒力氣  
不能抬



**1 weak Arm**

**2**片嘴唇  
言語不清  
不明白



**2 lips for slurred Speech**

立即撥打 **112**



**Time to call 112 now**

- 1) Which stroke awareness educational program can be easily remembered by the most people in Taiwan: FAST or Stroke 112 as indicated in the above image?
  - FAST (Face, Arm, Speech, Time) (The picture on the left)
  - Stroke 112 (The picture on the right, this is developed from FAST, but use the universal medical emergency phone number to represent stroke sign for quick recognition and dialing emergency phone number immediate)
  - I do not know
  - Other
- 2) What is your age?
- 3) What is your gender?
- 4) What is your occupation?
  - Medical staff (including past experience)
  - Non-medical staff
  - Other
- 5) Did you attend the introductory lecture for Stroke 112 at the annual meeting of the Taiwan Stroke Treatment and Research Society this year?
  - Yes
  - NO

調查設計（繁體中文，原稿）

**FAST** for rapid stroke identification

**辨識中風的徵兆**  
Is it a stroke?

**F** **Face** **臉部**  
Face look uneven? 看起來不對稱

**A** **Arm** **手臂**  
One arm hanging down? 一側無法舉起

**S** **peech** **言語**  
Slurred speech? 突然說話不清

**T** **ime** **立刻**  
Call 112 NOW. 撥打 112 馬上就醫



**中風 112** 快速識別中風  
Stroke 112 for rapid stroke identification

**1** 張臉  
不對稱  
嘴巴歪

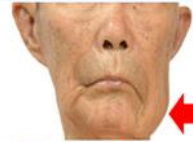

**1** uneven **F**ace

**1** 側手臂  
沒力氣  
不能抬

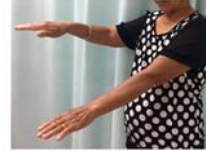

**1** weak **A**rm

**2** 片嘴唇  
言語不清  
不明白

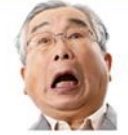

**2** lips for slurred **S**peech

立即撥打 **112**

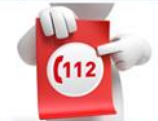

**Time to call 112 now**

- 1) 上面兩個中風快速識別的宣教材料中，對台灣人而言，那一個最容易記住？
  - FAST (Face, Arm, Speech, Time)（圖片左邊）
  - 中風 112（Stroke 112, 圖片右邊）(設計來自 FAST，保留 FAST 元素, 直接用世界通用急救號碼快速識別中風，立即撥打急救號碼)
  - 不知道
  - 其它（請註明）
- 2) 你的年齡是
- 3) 你的性別
- 4) 你的職業？
  - 醫務人員（包括曾經是）
  - 非醫務人員
  - 其他
- 5) 您聽了今年的台灣腦中風治療及研究醫學會的年會上中風 112 的講座嗎？
  - 沒有
  - 有

## **Legend for the videos**

To demonstrate the simplicity and feasibility of the strategy, we produced an educational video for Stroke 112 in English (supplemental video 1: Stroke 112\_E). This video is translated into Traditional Chinese without losing its core concept for easy understanding (supplemental video 2: Stroke 112\_C). The video can be translated to other languages. We can provide assistance in making such educational videos in other languages. Please contact Dr. Renyu Liu ([liur@uphs.upenn.edu](mailto:liur@uphs.upenn.edu)) for assistance.
